# Supplementary material for: CeOx-anchored β-Ni(OH)2 nanosheets onto nickel foam for efficient energy-saving hydrogen production via an electrocatalytic glucose oxidation reaction
Source: Royal Society of Chemistry journal article supplement (doi:10.1039/d4na00892h), 2024-12-16
Supplement: d4na00892h1.pdf [file d4na00892h1.pdf]

## Electronic Supplementary Information (ESI)

# **CeO<sub>x</sub>-anchored β-Ni(OH)<sub>2</sub> nanosheets onto nickel foam for efficient energy-saving hydrogen production via an electrocatalytic glucose oxidation reaction**

Cong Hong Nhat Nguyen<sup>a‡</sup>, Dinh Truong Nguyen<sup>b‡</sup>, Trung Hieu Le<sup>a</sup>, Lam Son Le<sup>a</sup>, Nga Hang Thi Phan<sup>b</sup>, Thi-Thao-Van Nguyen<sup>c</sup>, Nguyen Van Tiep<sup>d</sup>, Ekaterina Korneeva<sup>e</sup>, Anh Tuyen Luu<sup>f</sup>, My Uyen Dao<sup>g,h</sup>, Minh Tuan Nguyen Dinh<sup>i\*</sup>, and Chinh Chien Nguyen<sup>g,h\*</sup>

---

<sup>a</sup> Hue University of Sciences - Hue University, Hue City 530000, Vietnam.

<sup>b</sup> School of Medicine and Pharmacy, The University of Danang, Danang 550000, Vietnam.

<sup>c</sup> Graduate University of Science and Technology, Vietnam Academy of Science and Technology, Ha Noi 100000, Vietnam.

<sup>d</sup> Institute of Physics, Vietnam Academy of Science and Technology, 10 Dao Tan, Ba Dinh, Hanoi 10000, Vietnam.

<sup>e</sup> Flerov Laboratory of Nuclear Reactions, Joint Institute for Nuclear Research, 141980 Dubna, Moscow Reg., Russia.

<sup>f</sup> Center for Nuclear Technologies, Vietnam Atomic Energy Institute, Ho Chi Minh City, 700000, Vietnam.

<sup>g</sup> Center for Advanced Chemistry, Institute of Research and Development, Duy Tan University, Danang, 550000, Vietnam.

<sup>h</sup> Faculty of Natural sciences, Duy Tan University, Danang, 550000, Vietnam.

<sup>i</sup> Faculty of Chemical Engineering, University of Science and Technology, The University of Danang, 54 Nguyen Luong Bang, Da Nang 550000, Vietnam.

\*Email: nguyenchinhchien@duytan.edu.vn (C.C.N); ndmtuan@dut.udn.vn (M.T.N.D)

‡ These authors contributed equally.

Supplementary Information available: [details of any supplementary information available should be included here]. See DOI: 10.1039/x0xx00000x

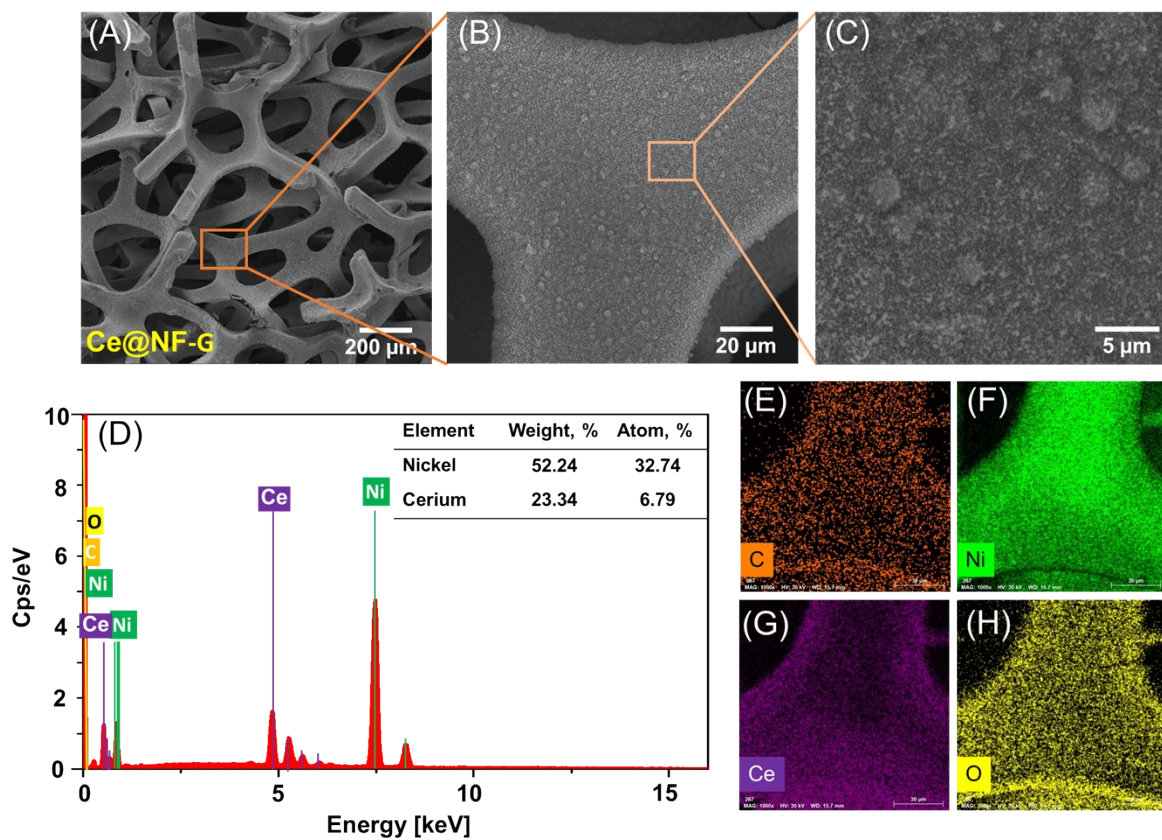

**Figure S1.** SEM image (A-C), EDX spectrum (D) and element mapping images (E-H) of as-prepared Ce@NF-G

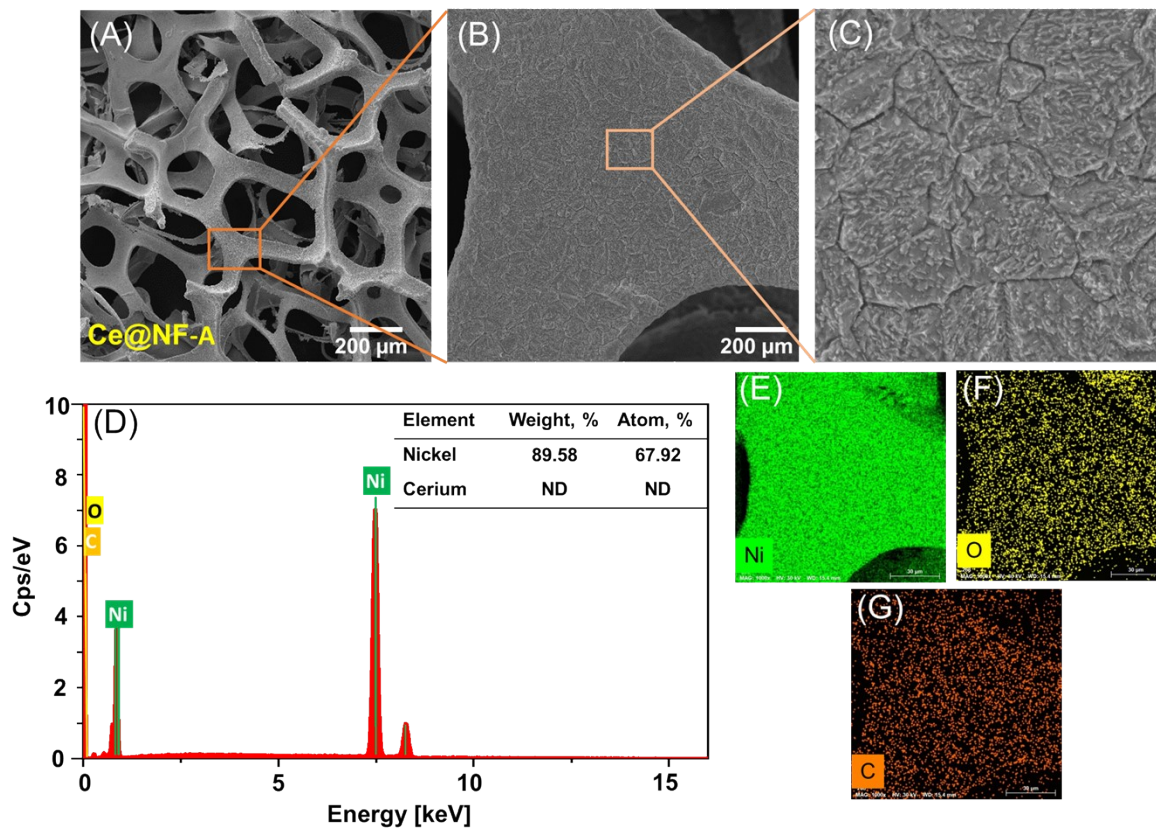

**Figure S2.** SEM image (A-C), EDX spectrum (D) and element mapping images (E-H) of as-prepared Ce@NF-A

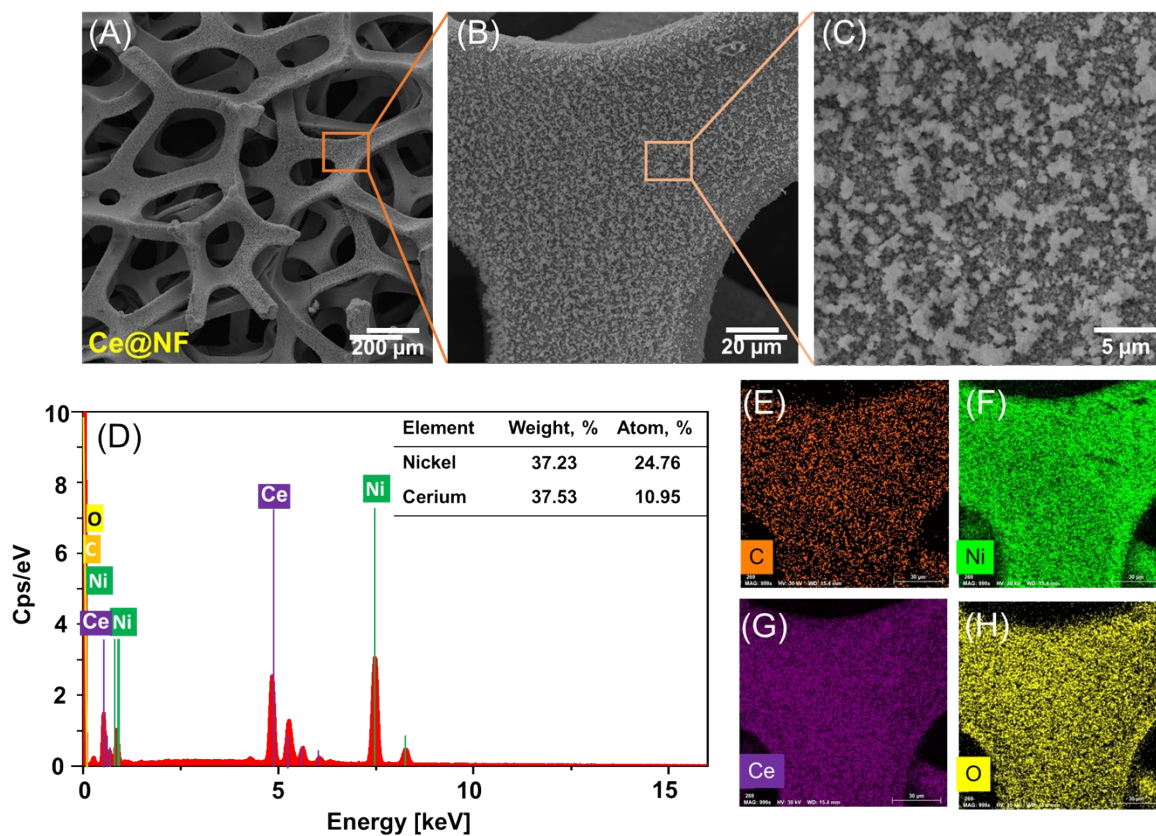

**Figure S3.** SEM image (A-C), EDX spectrum (D) and element mapping images (E-H) of as-prepared Ce@NF

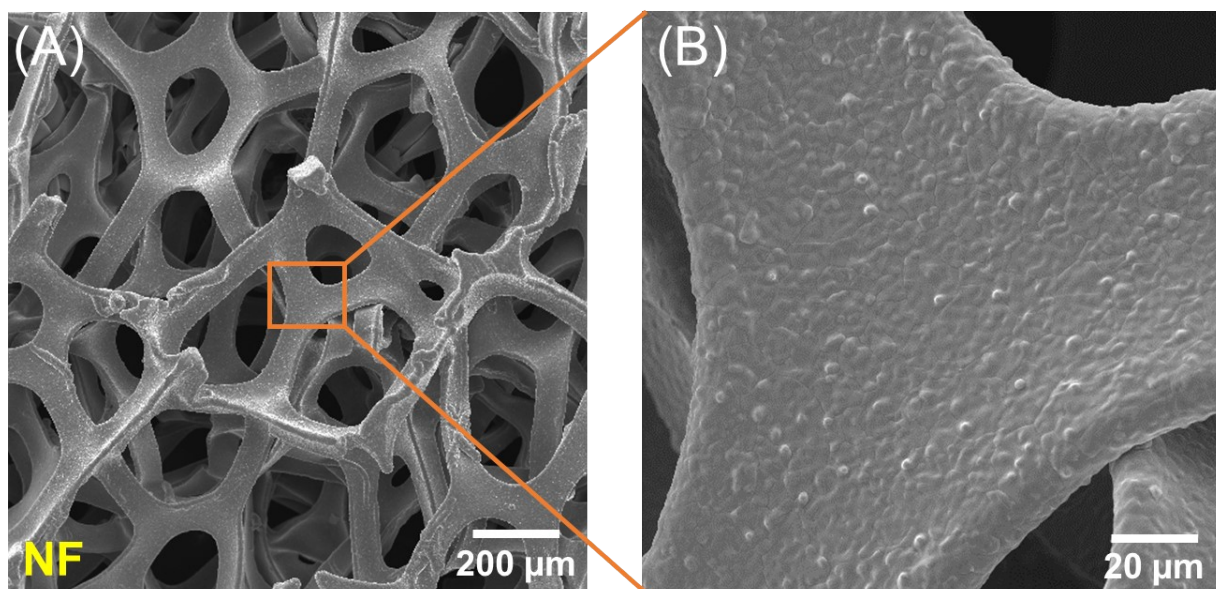

**Figure S4.** SEM image of bare NF

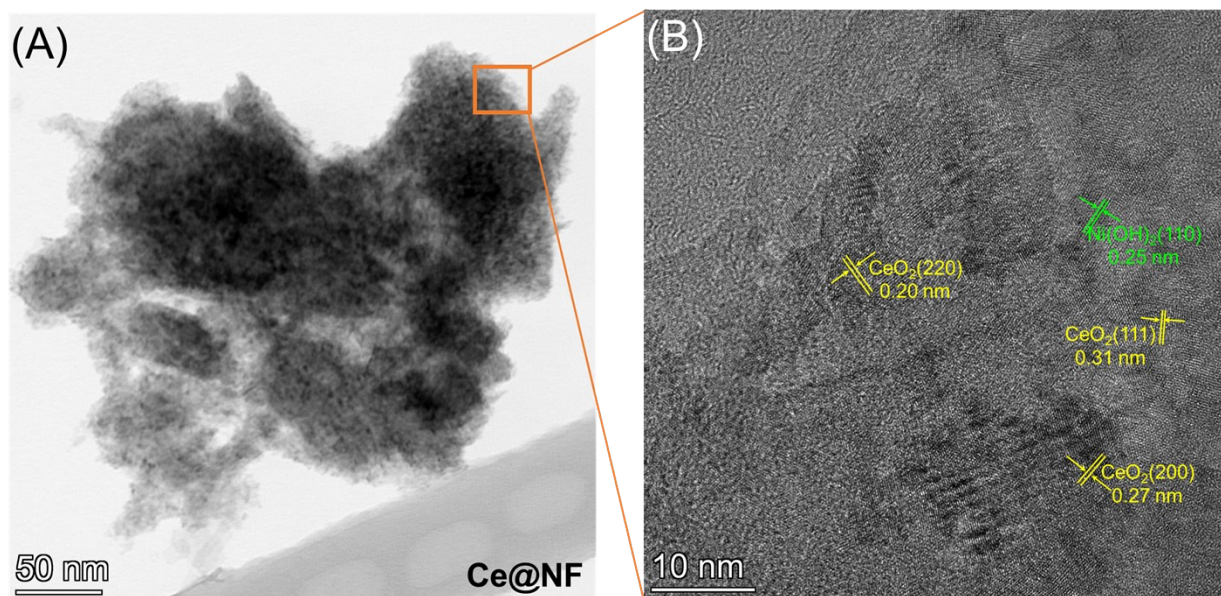

**Figure S5.** HR-TEM image of as-prepared Ce@NF samples

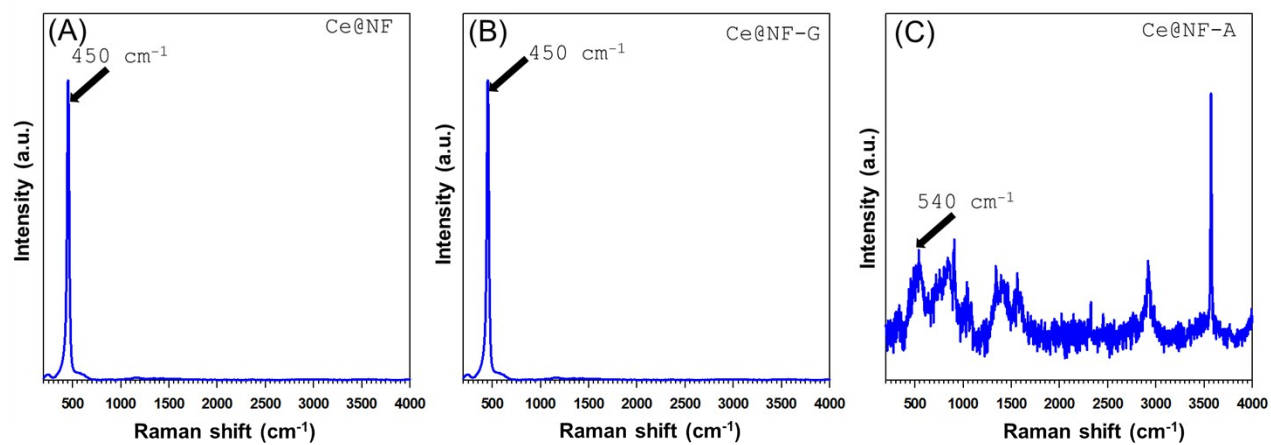

**Figure S6.** Raman spectra of as-prepared samples

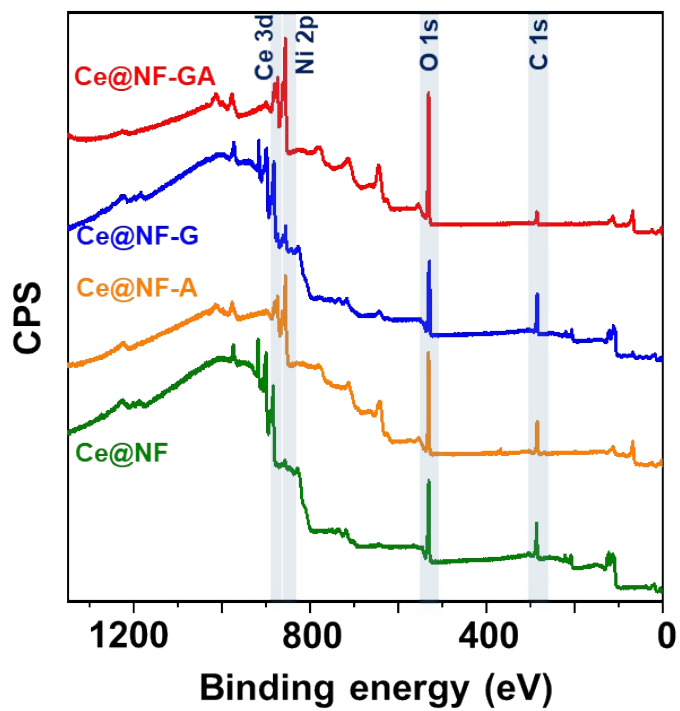

**Figure S7.** XPS survey spectra of as-prepared samples

**Table S1.** The area ratio of  $\text{Ce}^{3+}/\text{Ce}^{4+}$

| Sample   | $\text{Ce}^{3+}/\text{Ce}^{4+}$ ratio |
|----------|---------------------------------------|
| Ce@NF-GA | 0.46                                  |
| Ce@NF-G  | 0.24                                  |
| Ce@NF    | 0.05                                  |

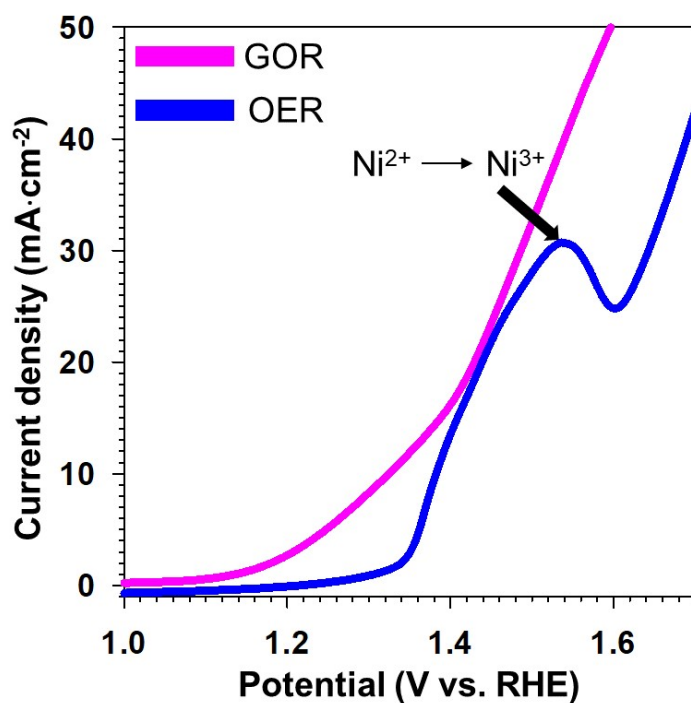

**Figure S8.** LSV curves of Ce@NF-GA electrode with and without glucose

**Table S2.** Comparison of the potentials required to the current density of  $10 \text{ mA}\cdot\text{cm}^{-2}$  for our as-synthesized catalyst (Ce@NF-GA) and available reported GOR catalysts

| Sample                  | Potential<br>at $10 \text{ mA}\cdot\text{cm}^{-2}$ | Electrolyte             | References |
|-------------------------|----------------------------------------------------|-------------------------|------------|
| Ce@NF-GA                | 1.31 V vs RHE                                      | 1 M KOH & 0.1 M glucose | This work  |
| (NiVP/Pi-VC)            | 1.3 V vs RHE                                       | 1 M KOH & 0.1 M glucose | 1          |
| Co(OH) <sub>2</sub> /CC | 1.34 V vs RHE                                      | 1 M KOH & 0.1 M glucose | 2          |

|                         |               |                         |   |
|-------------------------|---------------|-------------------------|---|
| Co-Ni                   | 1.39 V vs RHE | 1 M KOH & 0.1 M glucose | 3 |
| CNTs@Co/CoP             | 1.42 V vs RHE | 1 M KOH & 0.5 M glucose | 4 |
| Ni-MoS <sub>2</sub> NPs | 1.46 V vs RHE | 1 M KOH & 0.3 M glucose | 5 |

---

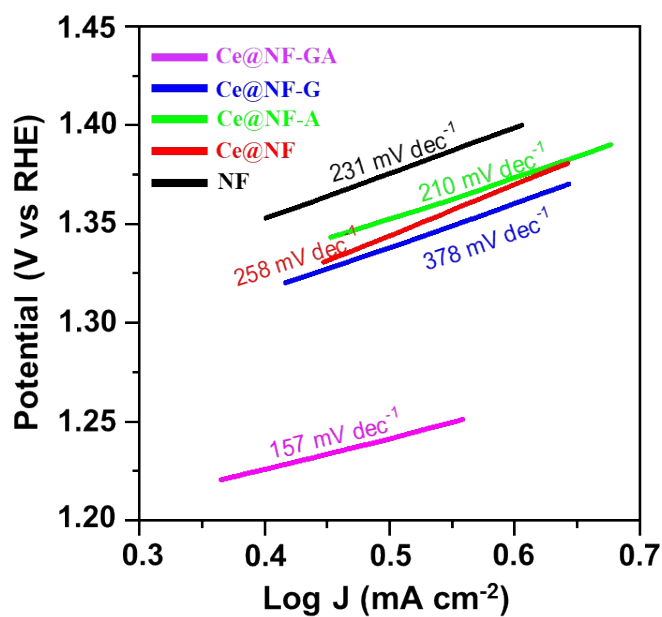

**Figure S9.** LSV- derived Tafel slope of as-prepared samples at scan rate of 0.1 mV s<sup>-1</sup>



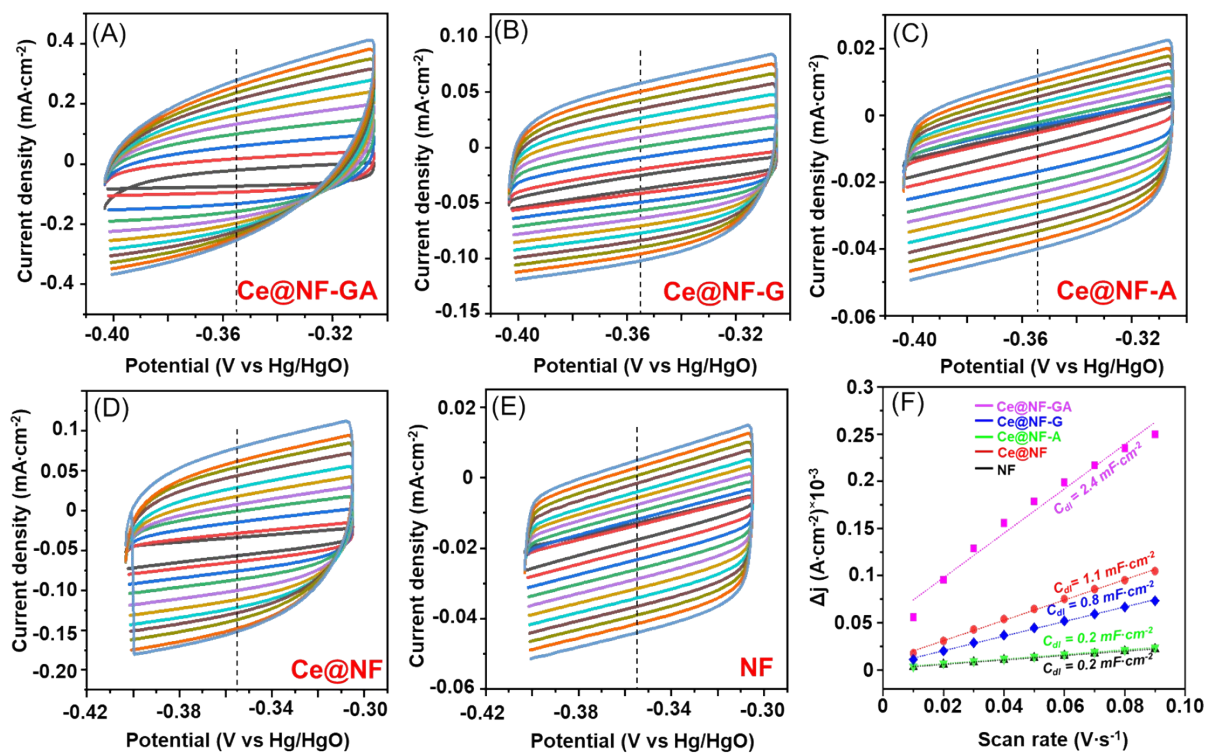

**Figure S10.** Electrochemically active surface area (ECSA) curves and electrochemical double-layer capacitance ( $C_{dl}$ ) values in GOR of as-prepared catalysts

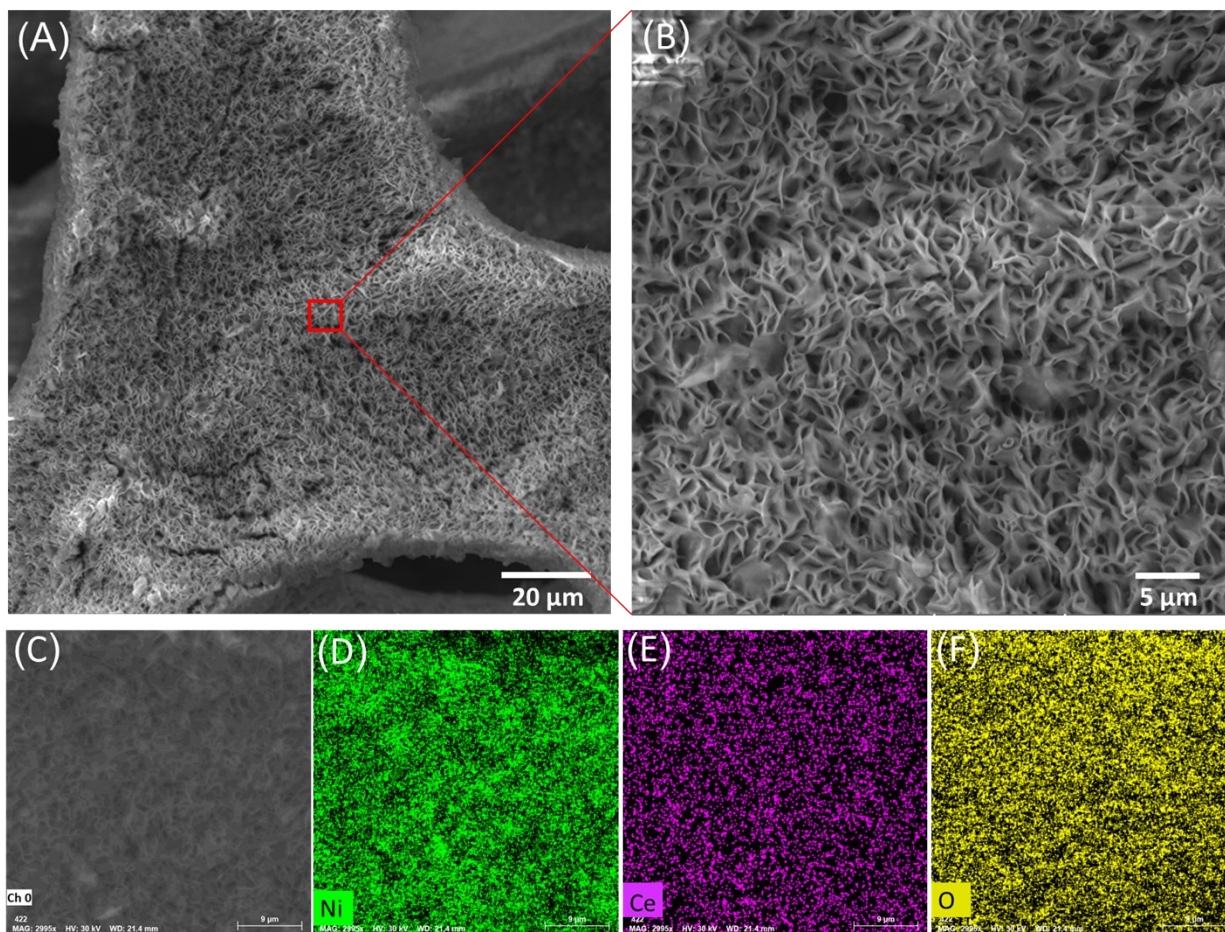

**Figure S11.** SEM images (A-B) and element mapping image (C-F) of Ce@NF-GA after stability testing

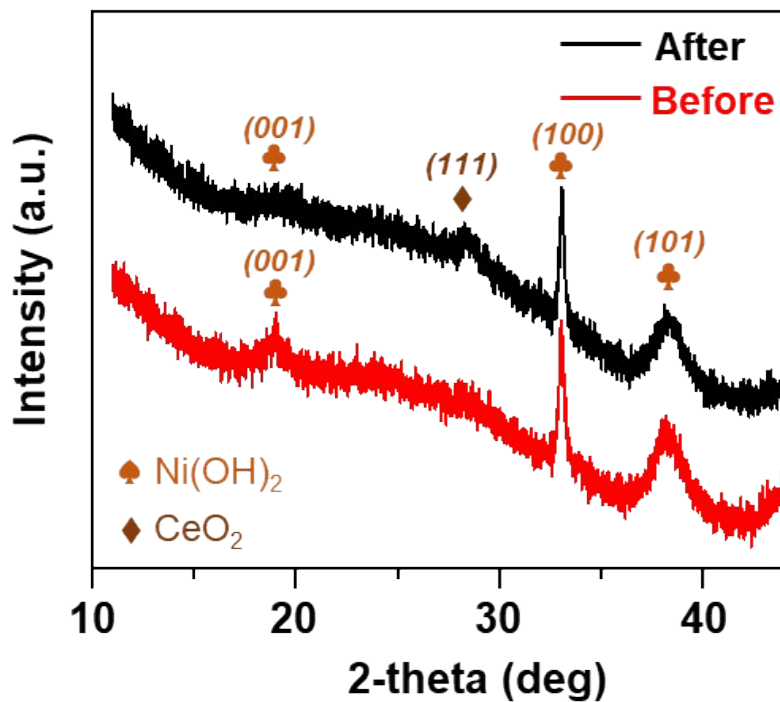

**Figure S12.** XRD patterns of Ce@NF-GA sample before and after stability testing

## References

1. N. Thakur, D. Mehta, A. Chaturvedi, D. Mandal and T. C. Nagaiah, *Journal of Materials Chemistry A*, 2023, **11**, 15868-15877.
2. C. Lin, H. Li, P. Zhang, C. Deng, L. Meng, Q. Zhou, S. Wang, J. Wu, C. Liu, J. Tian and Y. Qian, *Journal of Electroanalytical Chemistry*, 2020, **861**, 113946.
3. C. Lin, P. Zhang, S. Wang, Q. Zhou, B. Na, H. Li, J. Tian, Y. Zhang, C. Deng, L. Meng, J. Wu, C. Liu, J. Hu and L. Zhang, *Journal of Alloys and Compounds*, 2020, **823**, 153784.
4. Y. Zhang, Y. Qiu, Z. Ma, Y. Wang, Y. Zhang, Y. Ying, Y. Jiang, Y. Zhu and S. Liu, *Journal of Materials Chemistry A*, 2021, **9**, 10893-10908.

5. X. Liu, P. Cai, G. Wang and Z. Wen, *International Journal of Hydrogen Energy*, 2020, **45**, 32940-32948.
